# Supplementary material for: The efficacy of DNA vaccination is enhanced in mice by targeting the encoded protein to dendritic cells
Source: JCI journal article supplement (doi:10.1172/jci34224), 2008-03-10
Supplement: sd1 [file 1]

## Supplementary Figure 1

### A Specificity of the scDEC-GFP and scCont-GFP fusion proteins

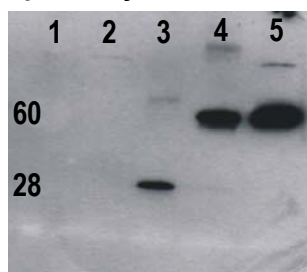

- 1) Crude lysate of pcDNA3.1 transfected 293T cells
- 2) His-Tag purified supernatant of pcDNA3.1 transfected 293T cells
- 3) His-Tag purified GFP
- 4) His-Tag purified scCont-GFP fusion protein from supernatant
- 5) His-Tag purified scDEC-GFP fusion protein from supernatant

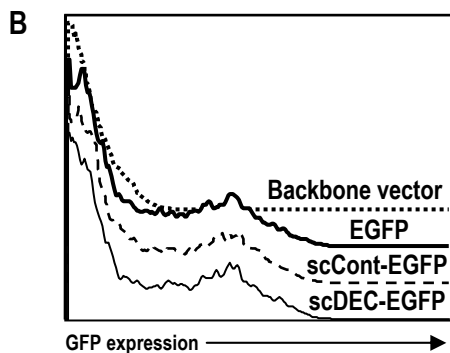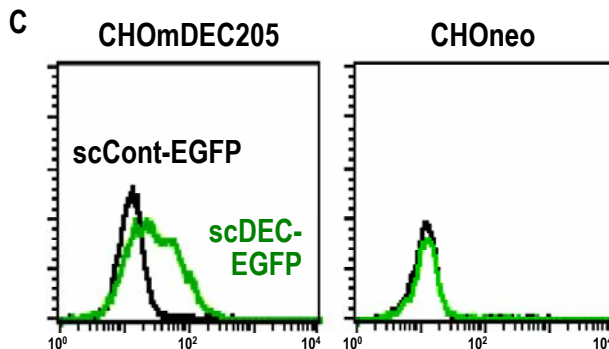

### Supplementary Figure 1.

Comparable expression of scDEC and Control GFP antibodies.

a) Western blot analysis of supernatants of 293T cells transfected with expression plasmids for the indicated single chain antibodies (scControlGFP or scDEC-GFP), EGFP (psecEGFP-H6) or empty expression plasmid (pcDNA3.1, Invitrogen) using a polyclonal antibody against EGFP.

b) Quantitation of GFP fluorescence of the different constructs by flow cytometry of the transfected 293T cells.

c) Binding to CHO mDEC205 cells expressing the DEC-205 receptor. Crude supernatants of 293T transfected T cells were incubated with the indicated CHO cells and then stained with anti-GFP antibodies.
